# Supplementary material for: Multi-locus and long amplicon sequencing approach to study microbial diversity at species level using the MinION™ portable nanopore sequencer
Source: PubMed Central journal article supplement (PMC5534310; doi:10.1093/gigascience/gix043), 2017-06-12
Supplement: gix043_GIGA-D-16-00108_Original_Submission.pdf [file gix043_GIGA-D-16-00108_Original_Submission.pdf]

[Click here to view linked References](#)

1  
2  
3  
4  
5  
6  
7  
8  
9  
10  
11  
12  
13  
14  
15  
16  
17  
18  
19  
20  
21  
22  
23  
24  
25  
26  
27  
28  
29  
30  
31  
32  
33  
34  
35  
36  
37  
38  
39  
40  
41  
42  
43  
44  
45  
46  
47  
48  
49  
50  
51  
52  
53  
54  
55  
56  
57  
58  
59  
60  
61  
62  
63  
64  
65

1           **Multi-locus and ultra-long amplicon sequencing**  
2           **approach to study microbial diversity at species level**  
3           **using the MinION™ portable nanopore sequencer**

5                                   **Alfonso Benítez-Páez\*, Yolanda Sanz**

7    Microbial Ecology, Nutrition & Health Research Unit. Institute of Agrochemistry and Food  
8    Technology Institute (IATA-CSIC), Valencia, Spain.

11   \*Corresponding author

12   C. Catedràtic Agustín Escardino Benlloch, 7.  
13   46980 Paterna-Valencia  
14   Spain  
15   Tel: +34 963 900 022 ext. 2129.  
16   Email: abenitez@iata.csic.es.

1  
2  
3  
4 18 **Abstract**

5  
6 19 **Background:** The miniaturised and portable DNA sequencer MinION™ has demonstrated  
7  
8  
9 20 great potential in different analyses such as genome-wide sequencing, pathogen outbreak  
10  
11 21 detection and surveillance, human genome variability, and microbial diversity. In this  
12  
13  
14 22 study, we tested the ability of the MinION™ platform to perform ultra-long amplicon  
15  
16 23 sequencing in order to design new approaches to study microbial diversity using a multi-  
17  
18  
19 24 locus approach.

20  
21 25 **Results:** Using R9 chemistry, we generated more than 17,000 reads in a single sequencing  
22  
23  
24 26 run of 40h. After compiling a robust database by parsing and extracting the *rrn* bacterial  
25  
26 27 region from more than 67,000 complete or draft bacterial genomes, we were able to  
27  
28 28 demonstrate that the data obtained during sequencing of the ultra-long amplicon in the  
29  
30  
31 29 MinION™ device was sufficient to study two mock microbial communities in a multiplex  
32  
33  
34 30 manner and to almost completely reconstruct the microbial diversity contained in the HM-  
35  
36 31 782D and D6305 mock communities.

37  
38 32 **Conclusions:** Although nanopore-based sequencing produces reads with lower per-base  
39  
40  
41 33 accuracy compared with other platforms, we presented a novel approach consisting of  
42  
43 34 multi-locus and ultra-long multiplex amplicon sequencing using the MinION™ MkI DNA  
44  
45 35 sequencer and R9 chemistry that helps to overcome the main disadvantage of this portable  
46  
47  
48 36 sequencing platform. Despite the technical issues impairing generation of 2D reads with  
49  
50  
51 37 more per-base accuracy, when processed with adequate alignment filters, the 1D reads  
52  
53 38 obtained this way were sufficient to characterize the microbial species present in each mock  
54  
55 39 community analysed. Improvements in nanopore chemistry, such as minimising base-  
56  
57  
58 40 calling errors and new library protocols able to produce rapid 1D libraries, will

59  
60  
61  
62  
63  
64  
65

1  
2  
3  
4  
5  
6  
7  
8  
9  
10  
11  
12  
13  
14  
15  
16  
17  
18  
19  
20  
21  
22  
23  
24  
25  
26  
27  
28  
29  
30  
31  
32  
33  
34  
35  
36  
37  
38  
39  
40  
41  
42  
43  
44  
45  
46  
47  
48  
49  
50  
51  
52  
53  
54  
55  
56  
57  
58  
59  
60  
61  
62  
63  
64  
65

41 provide more reliable information. Such data will be useful for more comprehensive and  
42 faster specific detection of microbial species and strains in complex ecosystems.

43

44 **Keywords:** MinION; Nanopore sequencer; Ribosomal operon; Ultra-long amplicon  
45 sequencing; Microbial diversity; Long-read sequencing

1  
2  
3  
4 **46 Background**

5  
6  
7 47 During the last two years, DNA sequencing based on single-molecule technology has  
8  
9 48 completely changed the perception of genomics for scientists working in a wide range of  
10  
11 49 scientific fields. This new perspective is not only supported by the technology itself but  
12  
13  
14 50 also by the affordability of these sequencing instruments. In fact,unprecedentedly, Oxford  
15  
16 51 Nanopore Technologies (ONT) released the first miniaturised and portable DNA sequencer  
17  
18 52 in early 2014, within the framework of the MinION™ Access Programme. As a  
19  
20  
21 53 consequence, certain scientists were initially granted with the MinION™, a USB flash-  
22  
23 54 sized device for DNA sequencing,operated from a computer via USB 3.0. After two years  
24  
25 55 working with the MinION™ device, the scientific community has demonstrated the  
26  
27  
28 56 hugeimpact of this technology on genomic analyses. Recently, the MARC consortium  
29  
30  
31 57 (MinION Analysis and Reference Consortium) has published results related to the study of  
32  
33 58 the reproducibility and global performance of the MinION™ platform. These results  
34  
35 59 indicate that this platform is susceptible of a large stochastic variation, essentially derived  
36  
37  
38 60 from the wet-lab and MinION™ operative methods, but also that variability has minimal  
39  
40  
41 61 impact on data quality [1].

42  
43  
44 62  
45  
46 63 The coordinated and collaborative work and mutual feedback between industry and the  
47  
48 64 scientific community have enabled ONT nanopore technology to develop rapidly towards  
49  
50  
51 65 improving its portable platform for DNA sequencing, minimizing the stochastic variation  
52  
53 66 during DNA library preparation. Moreover the MinION™ operative interface has become  
54  
55 67 more user-friendly. All the above are in addition to the on-going improvement in per-base  
56  
57  
58 68 accuracy of DNA reads derived from the MinION™ device. Consequently, in late Autumn

1  
2  
3  
4 69 2015, ONT released MkI, the latest version of MinION™, and in April 2016 the fast mode  
5  
6 70 chemistry (R9) was released, increasing the rate of sensing DNA strands from 30-70 to  
7  
8  
9 71 280-500 bp/sec and reaching up to 95% of per-base accuracy in 2D reads (Clive G. Brown,  
10  
11 72 CTO ONT, personal communication).  
12  
13  
14 73

15  
16 74 One of the most attractive capabilities of the MinION™ platform is the sequencing and  
17  
18 75 assembly of complete bacterial genomes using exclusively nanopore reads [2] or through  
19  
20  
21 76 hybrid approaches [3, 4]. Notwithstanding, the MinION™ platform has also been  
22  
23  
24 77 demonstrated useful in other relevant areas including: human genetic variant discovery [5,  
25  
26 78 6], detection of human pathogens [7, 8], detection of antibiotic resistance [9, 10], and  
27  
28  
29 79 microbial diversity [11, 12]. Regarding the latter, microbial diversity and taxonomic  
30  
31 80 approaches are common and in high demand to analyse the microbiota associated to a wide  
32  
33  
34 81 variety of environment- and human-derived samples. However, these analyses are greatly  
35  
36 82 limited by the short-read strategies commonly employed. Thanks to improvements in the  
37  
38  
39 83 chemistry of the most common, popular sequencing platforms in recent years, it is now  
40  
41 84 possible to characterise microbial communities in detail, down to the family or even genus  
42  
43  
44 85 level, using genetic information derived from roughly 30% (~500nt) of the full 16S rRNA  
45  
46 86 gene. Despite the massive coverage achieved with short-read methods, the limitation in  
47  
48  
49 87 terms of read length means taxonomic assignment at the species level is still unfeasible.  
50  
51 88 Consequently, implementation of long-read sequencing approaches to study larger  
52  
53 89 fragments of marker genes will permit the design of new studies to provide evidence for the  
54  
55  
56 90 central role of precise bacterial species/strains in a great variety of microbial consortia.

57  
58 91  
59  
60  
61  
62  
63  
64  
65

1  
2  
3  
4  
5  
6  
7  
8  
9  
10  
11  
12  
13  
14  
15  
16  
17  
18  
19  
20  
21  
22  
23  
24  
25  
26  
27  
28  
29  
30  
31  
32  
33  
34  
35  
36  
37  
38  
39  
40  
41  
42  
43  
44  
45  
46  
47  
48  
49  
50  
51  
52  
53  
54  
55  
56  
57  
58  
59  
60  
61  
62  
63  
64  
65

92 With respect to the above, we have recently explored the performance of the MinION™  
93 device. Our study demonstrates that data obtained from sequencing nearly full-length 16S  
94 rRNA gene amplicons is feasible to study microbial communities through nanopore  
95 technology [11]. We wanted to move a step forward in this type of strategy by designing a  
96 multi-locus and ultra-long amplicon sequencing method to study microbial diversity.  
97 Accordingly, here we present a study of the 16S, 23S, and the internal transcribed spacer  
98 (ITS, that frequently encodes tRNA genes) simultaneous sequencing, using the MinION™  
99 MkI device and R9 chemistry, with prior generation of ~4.5kb DNA fragments by  
100 amplifying the nearly full-length operon encoding the two larger ribosomal RNA genes in  
101 bacteria, the *rrn* region (*rrn* hereinafter). We have studied the *rrn* of two mock microbial  
102 communities, composed of genomic DNA from 20 and 8 different bacterial species,  
103 obtained respectively from BEI Resources and ZYMO Research Corp., using the  
104 MinION™ sequencing platform.

105

106 **Data description**

107 Raw data collected in this experiment were obtained as fast5 files using MinKNOW™  
108 v0.51.3.40 (Oxford Nanopore Technologies) after conversion of electric signals into base  
109 calls via the Metrichor™ agent v2.40.17 and the Barcoding plus 2D Basecalling RNN for  
110 SQK-NSK007 workflow v1.107. Base-called data passing quality control and filtering were  
111 downloaded and data was converted to fasta format using the *poRe* package [13]. Fast5 raw  
112 data can be accessed at the European Nucleotide Archive (ENA) under the project ID  
113 PRJEB15264. Only one data set was generated after a sequencing run of MinION™ MkI.

114

## 115 **Analysis**

116 The complete or partial gene sequence of the RNA attached to the small subunit of the  
117 ribosome is classically used to perform taxonomy and diversity analysis in complex  
118 samples containing hundreds of microbial species. In the case of bacterial species, the 16S  
119 rRNA gene is the most widely used DNA marker for taxonomic identification of a particular  
120 species, given the relatively high number of hypervariable regions (V1 to V9) present  
121 across its sequence. Nowadays, it is possible to study the complete or almost full-length  
122 sequence of the 16S rRNA molecule thanks to single-molecule sequencing approaches [11,  
123 14-16]. The identification of complex microbial communities at species-level with raw data  
124 obtained from MinION<sup>TM</sup> or PacBIO platforms is improving; however, uncertainty in  
125 taxonomic assignation is still noteworthy given the high proportion of errors in their reads.  
126 While future technical advances may improve the quality of DNA reads generated by third  
127 generation sequencing devices, new strategies can also be adopted to enhance the  
128 performance of these approaches. Consequently, we postulate that a good example of this is  
129 to study a common multi-locus region of the bacterial genome, which enables the  
130 simultaneous study of more variable regions and locus arrangements, and the operon  
131 encoding the ribosomal RNA. Using a complex sample where hundreds of microbial  
132 species are potentially present (DNA from human faeces) we carried out preliminary  
133 experiments to amplify the *rrn*. We observed that from the hypothetical configurations  
134 envisaged for the *rrn* (Figure 1A), we only obtained a clear amplification using the  
135 primerpairs S-D-Bact-0008-c-S-20 and 23S-2241R, indicating that the *rrn* preferentially  
136 seems to be transcriptionally arranged as follows: 16S-ITS-23S. A detailed evaluation of  
137 the fragment size determined that main PCR products ranged from 4.3 to 5.4kbp (Figure

1  
2  
3  
4  
5  
6  
7  
8  
9  
10  
11  
12  
13  
14  
15  
16  
17  
18  
19  
20  
21  
22  
23  
24  
25  
26  
27  
28  
29  
30  
31  
32  
33  
34  
35  
36  
37  
38  
39  
40  
41  
42  
43  
44  
45  
46  
47  
48  
49  
50  
51  
52  
53  
54  
55  
56  
57  
58  
59  
60  
61  
62  
63  
64  
65

138 [1B-D](#)), being consistent with the expected size of PCR products amplifying the 16S, ITS,  
139 and 23S regions from several microbial species. The next step involved designing a  
140 multiplex sequencing approach to try to analyse more than one sample per sequencing run  
141 in one flowcell of MinION™; therefore, the primers were re-designed to include a  
142 distinctive barcode region at 5′ ([Table 1](#)). During PCR of the *rrn* we tagged the amplicon  
143 derived from the mock community HM-782D with the barcode *bc01* in a dual manner,  
144 whereas the amplicons derived from sample D6305 were tagged with barcode *bc08* in  
145 similar way.

146  
147 For general knowledge, the DNA reads derived from the MinION™ device can be  
148 classified into three types: ‘template’, ‘complement’, and ‘2D’ reads. The latter, 2D reads,  
149 are products of aligning and merging sequences from the template (read from leader  
150 adapter) and complement reads (a second adapter called hairpin or HP adapter must be  
151 generated), produced from the same DNA fragment. These contain a lower error rate,  
152 owing to strand comparison and mismatch correction. Following the amplicon library  
153 construction and sequencing run, we obtained raw data consisting of 17,038 reads in HDF5  
154 (fast5) format, and almost all were classified as 1D reads. In addition to the technical issues  
155 indicative of a bad ligation of the HP adapter, we obtained 93% of reads (~15,900 reads)  
156 during the first 16h of run; thus, we obtained lower sequencing performance after re-  
157 loading with the second aliquot of the sequencing library and extended the run for another  
158 24h (40h in sum). Subsequent to base-calling with Metrichor™ agent, the HDF5 data files  
159 were converted into fasta format using the *poRe* [13] package. The fasta sequences were  
160 filtered by retaining those between 1500 and 7000nt in length, obtaining at least enough  
161 sequence information to compare a DNA sequence equivalent to the 16S rRNA gene length.



1  
2  
3  
4  
5  
6  
7  
8  
9  
10  
11  
12  
13  
14  
15  
16  
17  
18  
19  
20  
21  
22  
23  
24  
25  
26  
27  
28  
29  
30  
31  
32  
33  
34  
35  
36  
37  
38  
39  
40  
41  
42  
43  
44  
45  
46  
47  
48  
49  
50  
51  
52  
53  
54  
55  
56  
57  
58  
59  
60  
61  
62  
63  
64  
65

162 After this filtering step, we retained 72% of sequences (12,278) and then we performed the  
163 respective barcode splitting. For this purpose, we modified the default parameters of the  
164 "split\_barcodes.pl" perl script (Oxford Nanopore Technologies) by incorporating the  
165 information of the extended barcodes (Table 1), rather than the barcode information alone,  
166 and simultaneously increased the stringency parameter to 25 (14 by default). Afterwards  
167 the concatenation of reads were obtained from respective forward and reverse extended  
168 barcodes, then we retrieved a total of 2,019 (52% from forward and 48% from reverse  
169 barcodes) and 1,519 (53% from forward and 47% from reverse barcodes) 1D reads for HM-  
170 782D and D6305 mock communities, respectively. Read-mapping was performed against  
171 the *rrn* database, compiling more than 22,000 *rrn* regions, retrieved from more than 67,000  
172 genomes available in GenBank (see Availability of supporting data). The taxonomy  
173 associated to the best hit based on the alignment score followed by filtering steps (see  
174 methods) was used to determine the structure of each mock community. The MinION™  
175 sequencing data produced the microbial structure presented in Figure 2 for the mock  
176 communities HM-782D and D6305, respectively.

177

178 Figure 2 shows the bacterial species and their respective relative proportions retrieved from  
179 the analysis of the mock communities HM-782D and D6305, respectively. With respect to  
180 the HM782-D mock community, we were able to recover 20 representative species,  
181 accounting for 16 out of 20 species present in that artificial community (Figure 2A).  
182 However, the remaining four species that apparently are absent in this community have a  
183 close relationship to others detected correctly, namely *Bacillus subtilis*, *Bacillus*  
184 *thuringensis*, *Bacillus anthracis*, and *Propionibacterium sp.* Furthermore, we were unable  
185 to report the presence of just four species present in HM782-D because proportions of

1  
2  
3  
4  
5  
6  
7  
8  
9  
10  
11  
12  
13  
14  
15  
16  
17  
18  
19  
20  
21  
22  
23  
24  
25  
26  
27  
28  
29  
30  
31  
32  
33  
34  
35  
36  
37  
38  
39  
40  
41  
42  
43  
44  
45  
46  
47  
48  
49  
50  
51  
52  
53  
54  
55  
56  
57  
58  
59  
60  
61  
62  
63  
64  
65

186 *Rhodobacter sphaeroides* and *Actinomyces odontolyticus* were below the predominance  
187 threshold (1%), being present in 0.25 and 0.12%, respectively. Previously we have  
188 demonstrated that the low levels of 16S reads are a consequence of amplification bias  
189 derived from the PCR reaction and not from sequencing itself [11]. In this case, the new  
190 primer pair used to generate the ultra-long amplicons would seem to work more efficiently  
191 than those previously used, but apparently they still present issues at bacterial coverage  
192 level. When we revised the whole taxonomy contained in our *rrn* database, the compiling  
193 of non *rrn* regions for *Deinococcus radiodurans* and *Helicobacter pylori* partially  
194 explained the lack of these species in HM-782D analysed by the present approach.  
195 However, a new alignment process using individual 16S and 23S rRNA sequences obtained  
196 from GenBank and including those for *D. radiodurans* and *H. pylori*, respectively,  
197 demonstrated that at least *D. radiodurans* could be identified in a higher proportion than *A.*  
198 *odontolyticus* and *R. sphaeroides*, albeit in a lower proportion than our predominance  
199 threshold (data not shown). Regarding the results obtained from the D6305 mock  
200 community, we found a total of 10 bacterial species present in this mixed DNA sample, and  
201 eight of them matched the expected structure of the community. In this case we were able  
202 to recover 100% of the species present in the sample and the two additional members  
203 identified also have a close relationship within the *Bacillus* genus, as observed in the HM-  
204 782D sample (Figure 2B).

205  
206 When compared to reference values and proportions theoretically expected for the species  
207 present in the two mock communities, we observed some deviations that were greater  
208 in certain species. Particularly, in the HM-782D sample the lowest coverage biases were  
209 observed for *Actinomyces odontolyticus* (-5.36), *Rhodobacter sphaeroides* (-4.36), and

1  
2  
3  
4  
5  
6  
7  
8  
9  
10  
11  
12  
13  
14  
15  
16  
17  
18  
19  
20  
21  
22  
23  
24  
25  
26  
27  
28  
29  
30  
31  
32  
33  
34  
35  
36  
37  
38  
39  
40  
41  
42  
43  
44  
45  
46  
47  
48  
49  
50  
51  
52  
53  
54  
55  
56  
57  
58  
59  
60  
61  
62  
63  
64  
65

210 *Enterococcus faecalis* (-2.04). This indicates that such species, in addition to *D. radioduran*  
211 sand *H. pylori*, are more difficult to detect with the primers and PCR used here. By  
212 contrast, *Escherichia coli* (1.79) seems to be preferentially amplified, given that this species  
213 exhibited the highest positive coverage bias value (Figure 2C). The values obtained for  
214 D6305 were more homogeneous, and the lowest coverage bias was observed for  
215 *Lactobacillus fermentum* (-2.18) (Figure 2D). Although the low coverage bias for some  
216 species can be solved by selecting another pair of primers, the ability to recover almost all  
217 of them, at least in a low proportion, in itself represents an important attribute of this  
218 approach for inter-sample comparisons.

219  
220 Another remarkable feature highlighted by our results is the ability to discern reads  
221 obtained from both samples despite the high error rate of the 1D reads (ranging between 70  
222 and 87% sequence identity, according to high quality alignments), which make barcoding  
223 de-multiplexing difficult. With the configuration and parameters presented here we could  
224 efficiently distinguish the reads generated from HM-782D and D6305 amplicons. One  
225 example was the ability to discern close species, such as *Lactobacillus gasseri* and  
226 *Lactobacillus fermentum*, presented distinctively in HM-782D and D6305 samples,  
227 respectively. Also *Salmonella enterica* was determined only in D6305, despite its close  
228 relationship with *E. coli* at the 16S and 23S sequence level (close to 100%). Regarding the  
229 latter, the multiple sequence alignment built with *rrn* regions from both species was  
230 inspected directly distinguishing the ITS as the major source of variation between the two  
231 species (data not shown). Indeed, this was corroborated by the comparative analysis  
232 performed during the clustering step of the reference samples to create our *rrn* database.  
233 The full *rrn* region and its encoded genes were individually clustered at different sequence

1  
2  
3  
4  
5  
6  
7  
8  
9  
10  
11  
12  
13  
14  
15  
16  
17  
18  
19  
20  
21  
22  
23  
24  
25  
26  
27  
28  
29  
30  
31  
32  
33  
34  
35  
36  
37  
38  
39  
40  
41  
42  
43  
44  
45  
46  
47  
48  
49  
50  
51  
52  
53  
54  
55  
56  
57  
58  
59  
60  
61  
62  
63  
64  
65

234 identity levels (from 97 to 100%). This analysis indicated that 16S and 23S genes contain a  
235 similar level of variation by obtaining a comparable number of clusters (Figure 3). By  
236 contrast, the *rrn* region comprising the 16S, ITS, and 23S coding regions exhibits 2-fold  
237 more variation than that observed for the 16S molecule alone. Strikingly, the ITS regions  
238 showed the highest level of variability when over 3-fold more clusters were produced at 97,  
239 98 and 99% sequence identity. When parsing the genetic information of over 67,000  
240 bacterial genomes, we observed the ITS region frequently encodes one or several tRNA  
241 genes. We hypothesized this greater level of variation in the bacterial ITS is directly caused  
242 by the variety of tRNA genes encoded in this region, which would even enable different  
243 operons from the same bacterial chromosome to be distinguished. Furthermore, the smaller  
244 size of this region, together with the high level of sequence variability, would explain the  
245 larger number of clusters recovered when compared to the 16S alone.

246

## 247 **Discussion**

248 The inventory of microbial species based on 16S rDNA sequencing is frequently used in  
249 biomedical research to determine microbial organisms inhabiting the human body and their  
250 relationship with disease. Recently, third-generation of DNA sequencing platforms have  
251 developed rapidly, facilitating the identification of microbial species and overcoming the  
252 read-length issues inherent to second-generation sequencing methods. These advances  
253 allow researchers to infer taxonomy and analyse diversity from the almost full-length  
254 bacterial 16S rRNA sequence [11, 14-16]. Particularly, the ONT platform deserves special  
255 attention given its portability and its fast development since the MinION™ became  
256 available in 2014. Notwithstanding, this technology is susceptible to a large stochastic

1  
2  
3  
4  
5  
6  
7  
8  
9  
10  
11  
12  
13  
14  
15  
16  
17  
18  
19  
20  
21  
22  
23  
24  
25  
26  
27  
28  
29  
30  
31  
32  
33  
34  
35  
36  
37  
38  
39  
40  
41  
42  
43  
44  
45  
46  
47  
48  
49  
50  
51  
52  
53  
54  
55  
56  
57  
58  
59  
60  
61  
62  
63  
64  
65

257 variation, essentially derived from the wet-lab methods [1]. We corroborated this issue by  
258 obtaining a sequencing run where the raw data predominantly consisted of 1D reads as a  
259 consequence of the HP adapter ligation failure, despite following the manufacturer's  
260 instructions. However, we were able to develop an efficient analysis protocol where the  
261 higher read quality offered by R9 chemistry and the updated Metrichor basecaller protocol  
262 proved pivotal to obtain 1D reads with a range of identity between 70 and 86%, with  
263 sufficient per-base accuracy to successfully perform the taxonomic analyses described  
264 herein.

265

266 Our preliminary results indicated that the *rrn* region in bacteria preferentially has a unique  
267 conformation (with the transcriptional arrangement of 16S-ITS-23S) and we could amplify  
268 this ~4.5Kbp region with the selected S-D-Bact-0008-c-S-20 and 23S-2241R primer pair.  
269 Once we were able to distinguish the feasibility to amplify the *rrn*, our approach comprised  
270 the study of two different mock communities in a multiplex manner, to be combined in one  
271 single MinION™ flowcell. By designing the respective forward and reverse primers tagged  
272 with specific barcodes recommended by ONT, we were able to retrieve extended barcode-  
273 associated reads, in spite of the large proportion of per-base errors contained in these types  
274 of reads. Using MinION™ data based on multilocus markers and ultra-long amplicon  
275 sequencing, we could reconstruct the structure of two commercially available mock  
276 communities. Although the expected proportions of some species in each community  
277 exhibited an important coverage bias, we were able to recover 80% (HM-782D) and 100%  
278 (D6305) of bacterial species from the respective mock communities. Consequently, future  
279 analyses should be conducted to find an appropriate PCR approach using primers with a  
280 higher coverage for bacterial species.

1  
2  
3  
4  
5  
6  
7  
8  
9  
10  
11  
12  
13  
14  
15  
16  
17  
18  
19  
20  
21  
22  
23  
24  
25  
26  
27  
28  
29  
30  
31  
32  
33  
34  
35  
36  
37  
38  
39  
40  
41  
42  
43  
44  
45  
46  
47  
48  
49  
50  
51  
52  
53  
54  
55  
56  
57  
58  
59  
60  
61  
62  
63  
64  
65

281 We have analysed a great amount of genetic information with the aim of compiling a  
282 valuable database containing the genetic information for the *rrn* present in over 67,000  
283 draft and complete bacterial genomes. Using this genetic information of the *rrn* and  
284 clustered at 100% of sequence identity enabled us to establish a multi-locus marker able to  
285 discriminate the taxonomy of two mock communities containing very close species. The  
286 latter was possible given that simultaneous analysis of the 16S, ITS, and 23S molecules  
287 offered 2-fold more diversity than studying the 16S or 23S sequences separately. Moreover,  
288 the ITS was distinguished individually as a highly variable genetic region in terms of  
289 sequence and length. Furthermore, it contributes notably to the higher variability observed  
290 in the *rrn* region, a fact evidenced in previous studies [17-20]. The accumulation of a larger  
291 number of variable sites in the *rrn* region, together with the peculiarity of the ITS to  
292 potentially accommodate and encode tRNA genes, are thought to be central to  
293 discriminating bacterial species, despite the large proportion of per-base errors contained in  
294 MinION™ reads. This idea was supported by the fact that the alignments produced among  
295 high quality reads and reference sequences of the *rrn* database had a length average of  
296 2,655 and 2,918 bases for HM-782D and D6305, respectively. This latter is indicative that  
297 ITS genetic information was predominantly considered in our analysis no matter if reads  
298 were produced from the 16S or 23S edges of *rrn* amplicons. We expect this type of analysis  
299 will likely become more accurate over time as nanopore chemistry improves in future  
300 technology, with the concomitant increase in throughput, which is pivotal to disclose the  
301 hundreds of species present in complex microbial communities for analysis in human or  
302 environmental studies. Therefore, the multi-locus, ultra-long and multiplex methods  
303 described here represent a promising analysis routine for microbial and pathogen  
304 identification, relying on the sequence variation accumulated in approximately 5kbp of

1  
2  
3  
4 305 DNA, roughly accounting for the assessment of 1.25% of an average bacterial genome  
5  
6 306 (~4Mbp).  
7  
8

9 307

## 10 11 308 **Methods**

### 12 13 14 309 *Bacterial DNA and rrn amplicons*

15  
16  
17 310 The complex DNA sample for preliminary studies of *rrn* region arrangement consisted of  
18  
19 311 DNA isolated from faeces, kindly donated by a healthy volunteer upon informed consent.

20  
21  
22 312 An aliquot of 200 mg of human faeces was used to isolate microbial DNA using the  
23  
24 313 QIAamp DNA Stool Mini Kit (Qiagen) and following the manufacturer's instructions.

25  
26  
27 314 Finally, DNA was eluted in 100  $\mu$ L nuclease-free water and a DNA aliquot at 20 ng/ $\mu$ L

28  
29 315 was prepared for PCR reaction using the primer pairs S-D-Bact-0008-c-S-20 and 23S-

30  
31  
32 316 2241R or 23S-129F and S-D-Bact-1391-a-A-17 for testing configurations shown in [Figure](#)

33  
34 317 [1A](#) ([Table 1](#)). The band size was analysed using the Java-based GelAnalyzer tool

35  
36  
37 318 ([www.gelanalyzer.com](http://www.gelanalyzer.com)). Genomic DNA for the reference mock microbial communities

38  
39 319 was kindly donated by BEI Resources (<http://www.beiresources.org>) and ZYMO Research

40  
41  
42 320 Corp (<http://www.zymoresearch.com>). The composition of the mock communities was as

43  
44 321 follows: i) HM-782D is a genomic DNA mixture of 20 bacterial species containing

45  
46 322 equimolar ribosomal RNA operon counts (100,000 copies per organism per  $\mu$ L), as

47  
48  
49 323 indicated by the manufacturer; and ii) ZymoBIOMICS Cat No. D6305 (D6305 hereinafter)

50  
51 324 is a genomic DNA mixture of eight bacterial species (and two fungal species) presented in

52  
53  
54 325 equimolar amounts of DNA. According to manufacturers' instructions, 1  $\mu$ L of DNA from

55  
56  
57 326 each mock community was used to amplify all the genes contained in the *rrn*. DNA was

58  
59 327 amplified in triplicate by 27 PCR cycles at 95°C for 30 s, 49°C for 15 s, and 72°C for 210 s.  
60  
61  
62  
63  
64  
65

1  
2  
3  
4  
5  
6  
7  
8  
9  
10  
11  
12  
13  
14  
15  
16  
17  
18  
19  
20  
21  
22  
23  
24  
25  
26  
27  
28  
29  
30  
31  
32  
33  
34  
35  
36  
37  
38  
39  
40  
41  
42  
43  
44  
45  
46  
47  
48  
49  
50  
51  
52  
53  
54  
55  
56  
57  
58  
59  
60  
61  
62  
63  
64  
65

328 Phusion High-Fidelity Taq Polymerase (Thermo Scientific) and the primers S-D-Bact-  
329 0008-c-S-20 (mapping on 5' of 16S gene) and 23S-2241R (mapping on 3' of 23S gene),  
330 which target a wide range of bacterial 16S rRNA genes [21, 22]. As we wished to multiplex  
331 the sequencing of both mock communities into one single MinION™ flowcell, we designed  
332 a dual-barcode approach where respective primers were synthesized and fused with two  
333 different barcodes recommended by ONT (Table 1). Amplicons consisted of ~4.5kbp blunt-  
334 end fragments, which were purified using the Illustra GFX PCR DNA and Gel Band  
335 Purification Kit (GE Healthcare). Amplicon DNA was quantified using a Qubit 3.0  
336 fluorometer (Life Technologies).

337

338 *Amplicon DNA library preparation*

339 The Genomic DNA Sequencing Kit SQK-MAP006 was ordered from ONT and used to  
340 prepare the amplicon library for loading into the MinION™. Approximately 0.9µg of  
341 amplicon DNA (0.3 per mock community plus 0.3 µg of an extra query sample) were  
342 processed for end repair using the NEBNextUltra II End Repair/dA-tailing Module (New  
343 England Biolabs), and followed by purification using Agencourt AMPure XP beads  
344 (Beckman Coulter) and washing twice with 1 volume of fresh 70% ethanol. Subsequently,  
345 and according to the manufacturer's suggestions, we used 0.2 pmol of the purified  
346 amplicon DNA (~594 ng, assuming fragments of 4.5kbp in length) to perform the adapter  
347 ligation step. Ten µL of adapter mix, 2 µL of HP adapter, and 50 µL of Blunt/TA ligase  
348 master mix (New England Biolabs) were added in that order to the 38µL end-  
349 repaired amplicon DNA. The reaction was incubated at room temperature for 15 minutes, 1  
350 µL HP Tether was added and incubated for an additional 10 minutes at room temperature.



1  
2  
3  
4  
5  
6  
7  
8  
9  
10  
11  
12  
13  
14  
15  
16  
17  
18  
19  
20  
21  
22  
23  
24  
25  
26  
27  
28  
29  
30  
31  
32  
33  
34  
35  
36  
37  
38  
39  
40  
41  
42  
43  
44  
45  
46  
47  
48  
49  
50  
51  
52  
53  
54  
55  
56  
57  
58  
59  
60  
61  
62  
63  
64  
65

351 The adapter-ligated amplicon was recovered using MyOne C1-beads (Life Technologies)  
352 and rinsed with washing buffer provided with the Genomic DNA Sequencing Kit SQK-  
353 MAP006 (Oxford Nanopore Technologies). Finally, the sample was eluted from the  
354 MyOne C1-beads by adding 25  $\mu$ L of elution buffer and incubating for 10 minutes at 37°C  
355 before pelleting in a magnetic rack.

356

357 *Flowcell set-up*

358 A brand new, sealed R9flowcell was acquired from ONT and stored at 4°C before use. The  
359 flowcell was fitted to the MinION™ MkI prior to loading the sequencing mix, ensuring  
360 good thermal contact. The R9flowcell was primed twice using 71  $\mu$ L premixed nuclease-  
361 free water, 75  $\mu$ L 2x running buffer, and 4 $\mu$ L fuel mix. At least 10 minutes were required to  
362 equilibrate the flowcell before each round of priming and before final DNA library loading.

363

364 *Amplicon DNA sequencing*

365 The sequencing mix was prepared with 59 $\mu$ L nuclease-free water, 75  $\mu$ L 2x running buffer,  
366 12 $\mu$ L DNA library, and 4  $\mu$ L fuel mix. A standard 48-hour sequencing protocol was  
367 initiated using the MinKNOW™ v0.51.3.40. Base-calling was performed through data  
368 transference using the Metrichor™ agent v2.40.17 and the Barcoding plus 2D Basecalling  
369 RNN for SQK-NSK007 workflow v1.107. During the sequencing run, one additional  
370 freshly diluted aliquot of DNA library was loaded after 16 hours of initial input. The  
371 rawsequencing data derived from the two mock communities studied here was expected to  
372 account two-thirds of the data produced by the R9 flowcell used.

373

1  
2  
3  
4 374 *The rrn database*

5  
6 375 We built a database containing the genetic information for the 16S and 23S rRNA genes  
7  
8  
9 376 and the ITS sequence in all the complete and draft bacterial genomes available in the NCBI  
10  
11 377 database (<ftp://ftp.ncbi.nlm.nih.gov/genomes/genbank/bacteria>). A total of 67,199 genomes  
12  
13  
14 378 were analysed by downloading the "fna" files and parsing for rRNA genes into the  
15  
16 379 respective "gff" annotation file. Chromosome coordinates for *rrn* regions were parsed and  
17  
18  
19 380 used to extract such a DNA sequences from complete chromosomes or DNA contigs  
20  
21 381 assembled. The resulting *rrn* sequences were analysed and the length distribution was  
22  
23 382 assessed (Figure 1). We retrieved a total of 47, 698 *rrn* sequences with an average of  
24  
25  
26 383 4,993nt in length. By selecting the size distribution equal to the 99th percentile (two-sided),  
27  
28  
29 384 we discarded potential incomplete or aberrant annotated *rrn* sequences and observed that  
30  
31 385 *rrn* sequences can be found between 4,196 and 5,790nt; under these boundaries, our *rrn*  
32  
33 386 database finally accounted for a total of 46,920 sequences. Equivalent databases were built  
34  
35  
36 387 by parsing the respective *rrn* sequences with the RNAMmer tool to discriminate the 16S,  
37  
38 388 ITS, and 23S rRNA sequences [23]. To remove the level of redundancy of our *rrn* database  
39  
40  
41 389 and to maintain the potential discriminatory power at strain level, we performed clustering  
42  
43 390 analysis using USEARCH v8 tool for sequence analysis and the option *-otu\_radius\_pct*  
44  
45 391 equal 0 [24], thus obtaining a total of 22,350 reference sequences. For comparative aims,  
46  
47  
48 392 the *rrn* database and the 16S, ITS, and 23S databases were also analysed using the option -  
49  
50 393 *otu\_radius\_pct* with values ranging from 1 to 3. For accessing to *rrn* database and the  
51  
52  
53 394 respective species annotation, see Availability of supporting data.

54  
55 395

56  
57 396 *Data analysis*

1  
2  
3  
4  
5  
6  
7  
8  
9  
10  
11  
12  
13  
14  
15  
16  
17  
18  
19  
20  
21  
22  
23  
24  
25  
26  
27  
28  
29  
30  
31  
32  
33  
34  
35  
36  
37  
38  
39  
40  
41  
42  
43  
44  
45  
46  
47  
48  
49  
50  
51  
52  
53  
54  
55  
56  
57  
58  
59  
60  
61  
62  
63  
64  
65

397 Read-mapping was performed using the LAST aligner v.189 [25] with parameters -q1 -b1 -  
398 Q0 -a1 -r1. Each 1D read was compared in a competitive way against the entire *rrn*  
399 database and the best hit was selected by obtaining the highest alignment score. Alignment  
400 length as well as alignment coordinates in target and query sequences were parsed from the  
401 LAST output and the sequence identity between matched regions was calculated using the  
402 python *Levenshtein* distance package. High quality alignments were selected by filtering  
403 out those with identity values up to the 50th percentile of the distribution of identity values  
404 of all reads per sample (~69%). Therefore, taxonomy assignment was based exclusively on  
405 alignments with  $\geq 70\%$  identity. Basic stats, distributions, filtering, and comparisons were  
406 performed in R v3.2.0 (<https://cran.r-project.org>). For relative quantification of species the  
407 singletons were removed and the microbial species considered to be predominantly present  
408 in the mock communities were those with a relative a proportion  $\geq 1\%$ . The coverage bias  
409 was calculated by obtaining fold-change ( $\text{Log}_2$ ) of species-specific read counting against  
410 the expected (theoretical) average for the entire community according to information  
411 provided by the manufacturers.

412

### 413 **Availability of supporting data**

414 Accessions for the *rrn* database containing the reference sequences for alignments and  
415 taxonomic annotation is available at [https://github.com/alfbenpa/rrn\\_db](https://github.com/alfbenpa/rrn_db). The code source of  
416 the original *split\_barcodes.pl* perl script is available at  
417 <https://github.com/nanoporetech/barcoding/releases/tag/1.0.0> with ONT copyright.

418

### 419 **Abbreviations**

1  
2  
3  
4  
5  
6  
7  
8  
9  
10  
11  
12  
13  
14  
15  
16  
17  
18  
19  
20  
21  
22  
23  
24  
25  
26  
27  
28  
29  
30  
31  
32  
33  
34  
35  
36  
37  
38  
39  
40  
41  
42  
43  
44  
45  
46  
47  
48  
49  
50  
51  
52  
53  
54  
55  
56  
57  
58  
59  
60  
61  
62  
63  
64  
65

420 EC , European Commission; ENA, European Nucleotide Archive; HDF, Hierarchical Data  
421 Format; ITS, internal transcribed spacer; NCBI, National Center for Biotechnology  
422 Information; ONT, Oxford Nanopore Technologies; PCR, Polymerase Chain Reaction;  
423 rDNA, DNA encoding for the Ribosomal RNA; rRNA, Ribosomal RNA;*rrn*, the DNA  
424 region containing the 16S and 23S bacterial rRNA genes and its respective ITS region;  
425 USB, Universal Serial Bus.

426  
427 **Competing interests**

428 ABP is part of the MinION™ Access Programme (MAP).

429  
430 **Authors' contributions**

431 ABP and YS designed the study and managed the project. ABP performed the experiments,  
432 analysed and managed the data. ABP draft the manuscript. Both authors read and approved  
433 the final manuscript.

434  
435 **Acknowledgements**

436 This work and the contract to ABP is supported by the European Union's Seventh  
437 Framework Program under the grant agreement n° 613979 (MyNewGut).

438

1. Ip CL, Loose M, Tyson JR, de Cesare M, Brown BL, Jain M, Leggett RM, Eccles DA, Zalunin V, Urban JM *et al*: **MinION Analysis and Reference Consortium: Phase 1 data release and analysis**. *F1000Res* 2015, **4**:1075.
2. Loman NJ, Quick J, Simpson JT: **A complete bacterial genome assembled de novo using only nanopore sequencing data**. *Nat Methods* 2015, **12**(8):733-735.
3. Karlsson E, Larkeryd A, Sjodin A, Forsman M, Stenberg P: **Scaffolding of a bacterial genome using MinIONnanopore sequencing**. *Sci Rep* 2015, **5**:11996.
4. Risse J, Thomson M, Patrick S, Blakely G, Koutsovoulos G, Blaxter M, Watson M: **A single chromosome assembly of *Bacteroidesfragilis* strain BE1 from Illumina and MinIONnanopore sequencing data**. *Gigascience*2015, **4**:60.
5. Ammar R, Paton TA, Torti D, Shlien A, Bader GD: **Long read nanopore sequencing for detection of HLA and CYP2D6 variants and haplotypes**. *F1000Res* 2015, **4**:17.
6. Norris AL, Workman RE, Fan Y, Eshleman JR, Timp W: **Nanopore sequencing detects structural variants in cancer**. *Cancer BiolTher*2016:1-8.
7. Greninger AL, Naccache SN, Federman S, Yu G, Mbala P, Bres V, Stryke D, Bouquet J, Somasekar S, Linnen JM *et al*: **Rapid metagenomic identification of viral pathogens in clinical samples by real-time nanopore sequencing analysis**. *Genome Med* 2015, **7**(1):99.
8. Kilianski A, Haas JL, Corriveau EJ, Liem AT, Willis KL, Kadavy DR, Rosenzweig CN, Minot SS: **Bacterial and viral identification and differentiation by amplicon sequencing on the MinIONnanopore sequencer**. *Gigascience*2015, **4**:12.
9. Ashton PM, Nair S, Dallman T, Rubino S, Rabsch W, Mwaigwisya S, Wain J, O'Grady J: **MinIONnanopore sequencing identifies the position and structure of a bacterial antibiotic resistance island**. *Nat Biotechnol*2015, **33**(3):296-300.
10. Judge K, Harris SR, Reuter S, Parkhill J, Peacock SJ: **Early insights into the potential of the Oxford NanoporeMinION for the detection of antimicrobial resistance genes**. *J AntimicrobChemother*2015, **70**(10):2775-2778.
11. Benitez-Paez A, Portune KJ, Sanz Y: **Species-level resolution of 16S rRNA gene amplicons sequenced through the MinION portable nanopore sequencer**. *Gigascience*2016, **5**:4.
12. Li C, Cheng KR, Boey JHE, Ng HQA, Wilm A, Nagarajan N: **INC-Seq: Accurate single molecule reads using nanopore sequencing**. *bioRxiv*2016:doi:<http://dx.doi.org/10.1101/038042>
13. Watson M, Thomson M, Risse J, Talbot R, Santoyo-Lopez J, Gharbi K, Blaxter M: **poRe: an R package for the visualization and analysis of nanopore sequencing data**. *Bioinformatics* 2014, **31**(1):114-115.
14. Li C, Chng KR, Boey EJ, Ng AH, Wilm A, Nagarajan N: **INC-Seq: accurate single molecule reads using nanopore sequencing**. *Gigascience*2016, **5**(1):34.
15. Schloss PD, Jenior ML, Koumpouras CC, Westcott SL, Highlander SK: **Sequencing 16S rRNA gene fragments using the PacBio SMRT DNA sequencing system**. *PeerJ*2016, **4**:e1869.

1  
2  
3  
4  
5  
6  
7  
8  
9  
10  
11  
12  
13  
14  
15  
16  
17  
18  
19  
20  
21  
22  
23  
24  
25  
26  
27  
28  
29  
30  
31  
32  
33  
34  
35  
36  
37  
38  
39  
40  
41  
42  
43  
44  
45  
46  
47  
48  
49  
50  
51  
52  
53  
54  
55  
56  
57  
58  
59  
60  
61  
62  
63  
64  
65

483 16. Shin J, Lee S, Go MJ, Lee SY, Kim SC, Lee CH, Cho BK: **Analysis of the mouse**  
484 **gut microbiome using full-length 16S rRNA amplicon sequencing.** *Sci Rep* 2016,  
485 **6:29681.**

486 17. Fernandez J, Avendano-Herrera R: **Analysis of 16S-23S rRNA gene internal**  
487 **transcribed spacer of *Vibrio anguillarum* and *Vibrio ordalii* strains isolated**  
488 **from fish.** *FEMS Microbiol Lett* 2009, **299(2):184-192.**

489 18. Maslunka C, Gurtler V, Seviour R: **Unusual features of the sequences of copies of**  
490 **the 16S-23S rRNA internal transcribed spacer regions of**  
491 ***Acinetobacter bereziniae*, *Acinetobacter guillouiae* and *Acinetobacter baylyi***  
492 **arise from horizontal gene transfer events.** *Microbiology* 2015, **161(Pt 2):322-**  
493 **329.**

494 19. Stewart FJ, Cavanaugh CM: **Intragenomic variation and evolution of the**  
495 **internal transcribed spacer of the rRNA operon in bacteria.** *J Mol Evol* 2007,  
496 **65(1):44-67.**

497 20. Tambong JT, Xu R, Bromfield ES: **Intercistronic heterogeneity of the 16S-23S**  
498 **rRNA spacer region among *Pseudomonas* strains isolated from subterranean**  
499 **seeds of hog peanut (*AmphicarpabRACTEATA*).** *Microbiology* 2009, **155(Pt 8):2630-**  
500 **2640.**

501 21. Hunt DE, Klepac-Ceraj V, Acinas SG, Gautier C, Bertilsson S, Polz MF:  
502 **Evaluation of 23S rRNA PCR primers for use in phylogenetic studies of**  
503 **bacterial diversity.** *Appl Environ Microbiol* 2006, **72(3):2221-2225.**

504 22. Klindworth A, Pruesse E, Schweer T, Peplies J, Quast C, Horn M, Glockner FO:  
505 **Evaluation of general 16S ribosomal RNA gene PCR primers for classical and**  
506 **next-generation sequencing-based diversity studies.** *Nucleic Acids Res* 2012,  
507 **41(1):e1.**

508 23. Lagesen K, Hallin P, Rodland EA, Staerfeldt HH, Rognes T, Ussery DW:  
509 **RNAmmr: consistent and rapid annotation of ribosomal RNA genes.** *Nucleic*  
510 *Acids Res* 2007, **35(9):3100-3108.**

511 24. Edgar RC: **Search and clustering orders of magnitude faster than BLAST.**  
512 *Bioinformatics* 2010, **26(19):2460-2461.**

513 25. Frith MC, Hamada M, Horton P: **Parameters for accurate genome alignment.**  
514 *BMC Bioinformatics* 2010, **11:80.**

1  
2  
3  
4  
5  
6  
7  
8  
9  
10  
11  
12  
13  
14  
15  
16  
17  
18  
19  
20  
21  
22  
23  
24  
25  
26  
27  
28  
29  
30  
31  
32  
33  
34  
35  
36  
37  
38  
39  
40  
41  
42  
43  
44  
45  
46  
47  
48  
49  
50  
51  
52  
53  
54  
55  
56  
57  
58  
59  
60  
61  
62  
63  
64  
65

516 **Figure legends**

517  
518 **Figure 1.** Organization of the *rrn* region in bacteria. A - hypothetical transcriptional  
519 arrangements expected for *rrn* and tested experimentally using two sets of primer pairs (see  
520 small arrows drawn in each configuration). B - Agarose gel electrophoresis of PCR  
521 reactions performed under the two hypothetical arrangements of *rrn*; lanes: 1) 1kb ruler  
522 (Fermentas), 2) PCR reaction from the top configuration in panel A, 3) PCR reaction from  
523 the bottom configuration in panel A. The GelAnalyser Java application was used to perform  
524 the band size analysis of the 1kb ruler standard (C) and the amplicons obtained from human  
525 faecal DNA (D).

526  
527 **Figure 2.** Microbial structure of the mock communities. A and B - microbial species and  
528 respective relative proportions determined to be present in the HM-782D and D6305 mock  
529 communities, respectively, following the analysis of raw data obtained from *rrn* amplicon  
530 sequencing in the MinION™. C and D - Comparative analysis of the expected microbial  
531 species and proportions against the data obtained after mapping of reads generated by a  
532 4.5kbp amplicon PCR and sequenced in MinION™ device, for HM-782D and D6305  
533 respectively.

534  
535 **Figure 3.** Variability of the *rrn* region and its functional domains. The *rrn* database  
536 compiled after parsing more than 67,000 draft and complete bacterial genomes was  
537 assessed by clustering analysis at different levels of sequence identity: 97 (white bars), 98  
538 (light grey bars), 99 (dark grey bars), and 100% (black bars). For comparative aims, the  
539 functional DNA sequences encoded into the *rrn* region were also individually studied. The  
540 fold numbers located at the top of respective ITS, 23S and *rrn* bars indicate the proportion  
541 of clusters found and normalized to those found in the 16S.

Table 1. Barcodes and primers used to generate amplicon libraries.

| Sample                    | Barcode                                          | Primer                                         | Barcode extended <sup>1</sup>                                                 |
|---------------------------|--------------------------------------------------|------------------------------------------------|-------------------------------------------------------------------------------|
| <b>HM-782D</b>            | (bc01)<br>GGTGCTGAAGAAAGTTGTCGGTGTCTTTGTGTTAACCT | (S-D-Bact-0008-c-S-20)<br>AGAGTTTGATCMTGGCTCAG | (bc01F)<br><u>GGTGCTGAAGAAAGTTGTCGGTGTCTTTGTGTTAACCT</u> AGAGTTTGATCMTGGCTCAG |
|                           | (bc01)<br>GGTGCTGAAGAAAGTTGTCGGTGTCTTTGTGTTAACCT | (23S-2241R)<br>ACCGCCCCAGTHAAACT               | (bc01R)<br><u>GGTGCTGAAGAAAGTTGTCGGTGTCTTTGTGTTAACCT</u> ACCGCCCCAGTHAAACT    |
| <b>D6503</b>              | (bc08)<br>GGTGCTGTTTCAGGGAACAAACCAAGTTACGTTAACCT | (S-D-Bact-0008-c-S-20)<br>AGAGTTTGATCMTGGCTCAG | (bc08F)<br><u>GGTGCTGTTTCAGGGAACAAACCAAGTTACGTTAACCT</u> AGAGTTTGATCMTGGCTCAG |
|                           | (bc08)<br>GGTGCTGTTTCAGGGAACAAACCAAGTTACGTTAACCT | (23S-2241R)<br>ACCGCCCCAGTHAAACT               | (bc08R)<br><u>GGTGCTGTTTCAGGGAACAAACCAAGTTACGTTAACCT</u> ACCGCCCCAGTHAAACT    |
| <b>Other primers used</b> |                                                  |                                                |                                                                               |
| <b>Human fecal DNA</b>    |                                                  | (S-D-Bact-1391-a-A-17)<br>GACGGGCGGTGWGTRCA    |                                                                               |
|                           |                                                  | (23S-129F)<br>CYGAATGGGRVAACC                  |                                                                               |

1 Underlined sequences correspond with the barcode sequence



**A**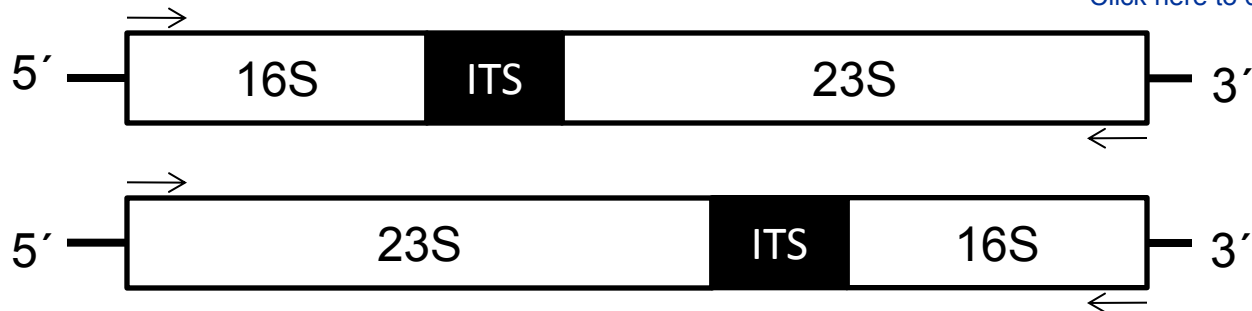**B**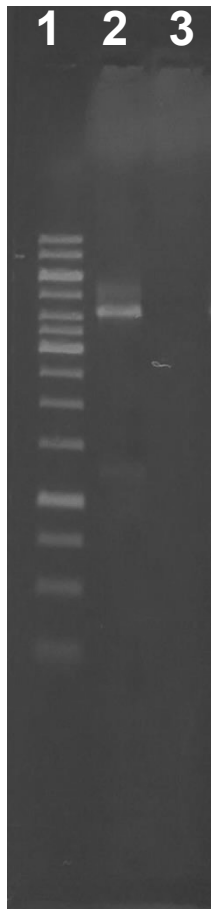**C**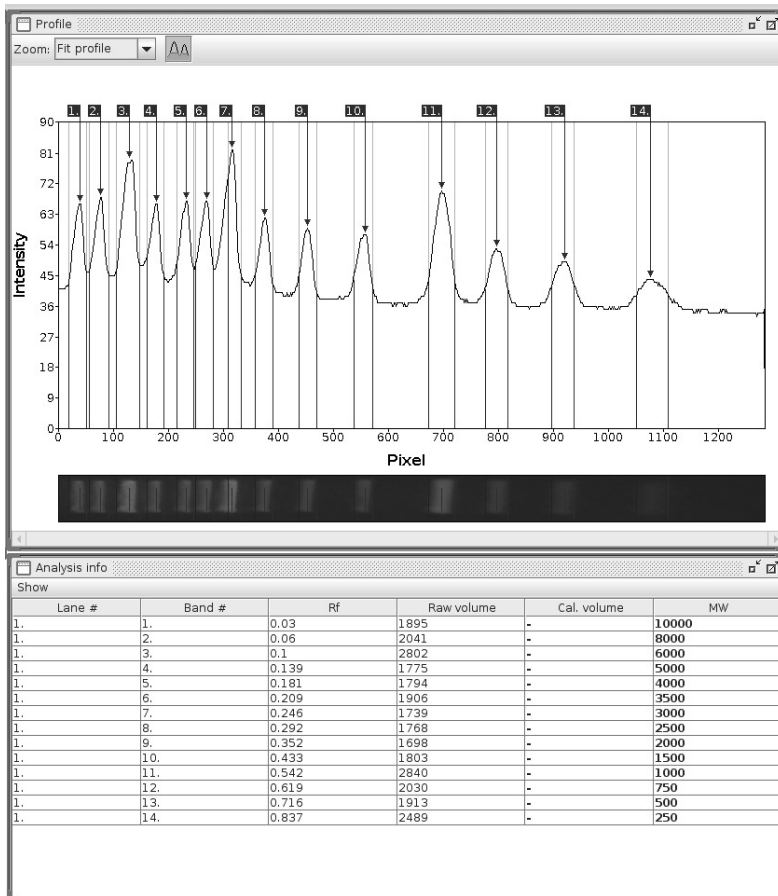**D**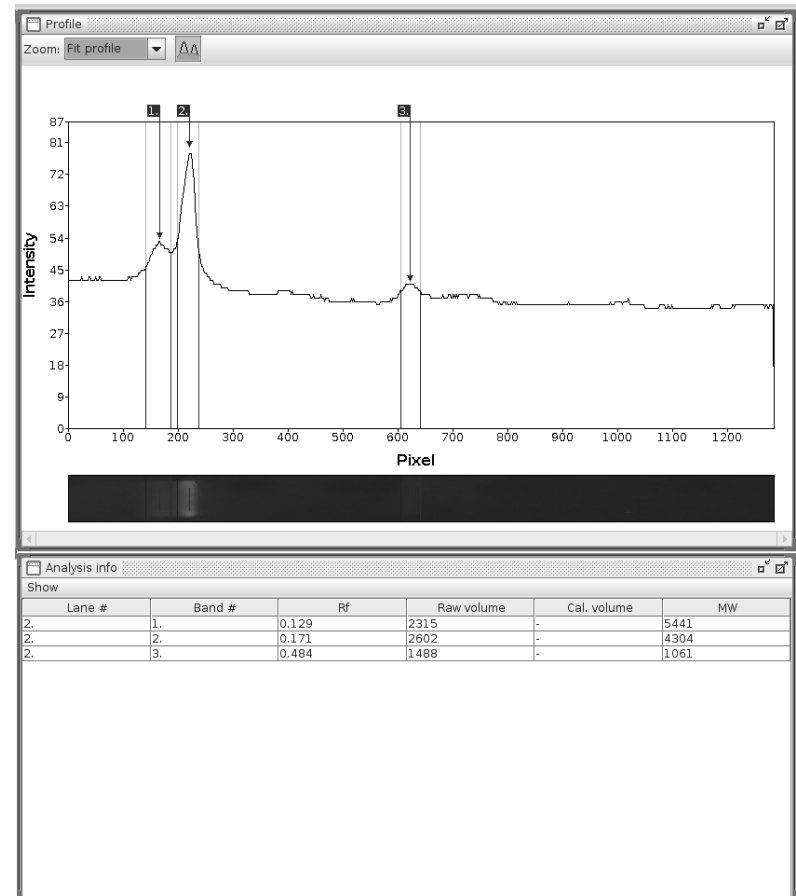

**A**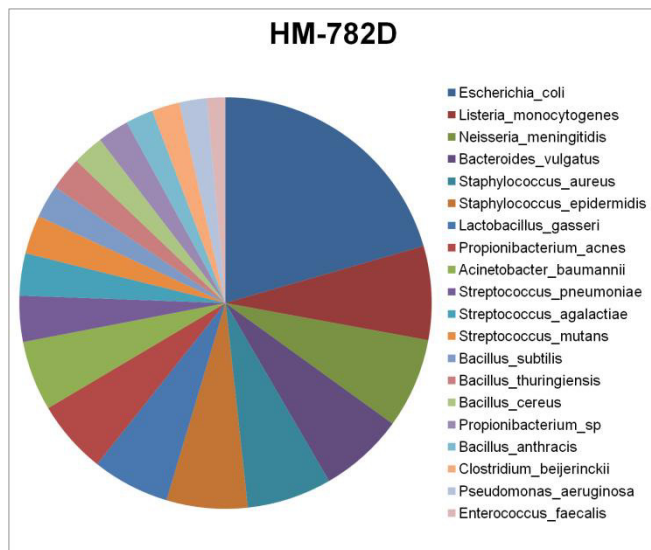**B**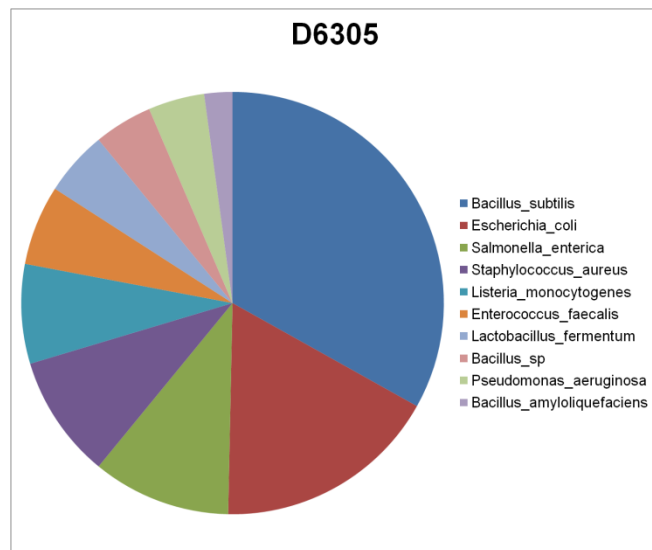**C**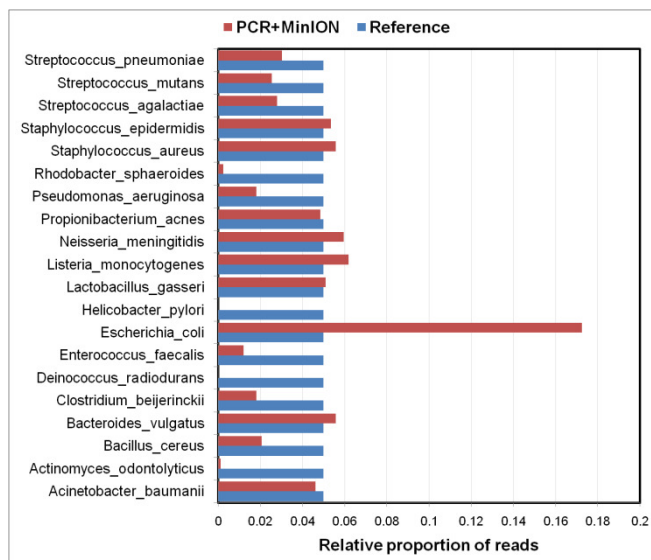**D**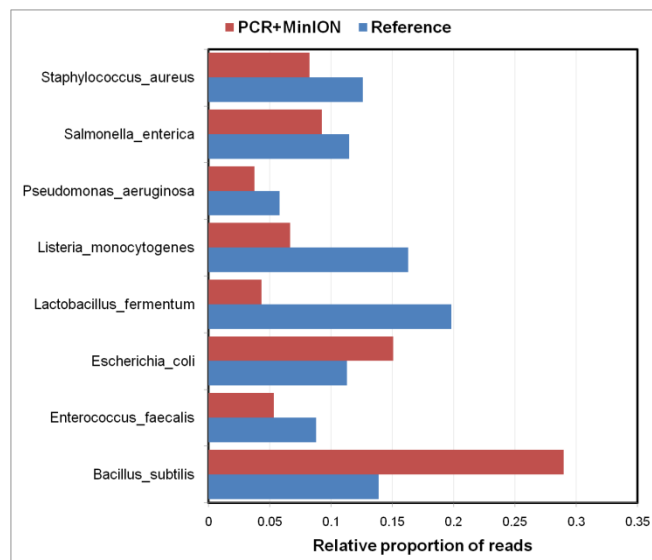

97% 98% 99% 100%

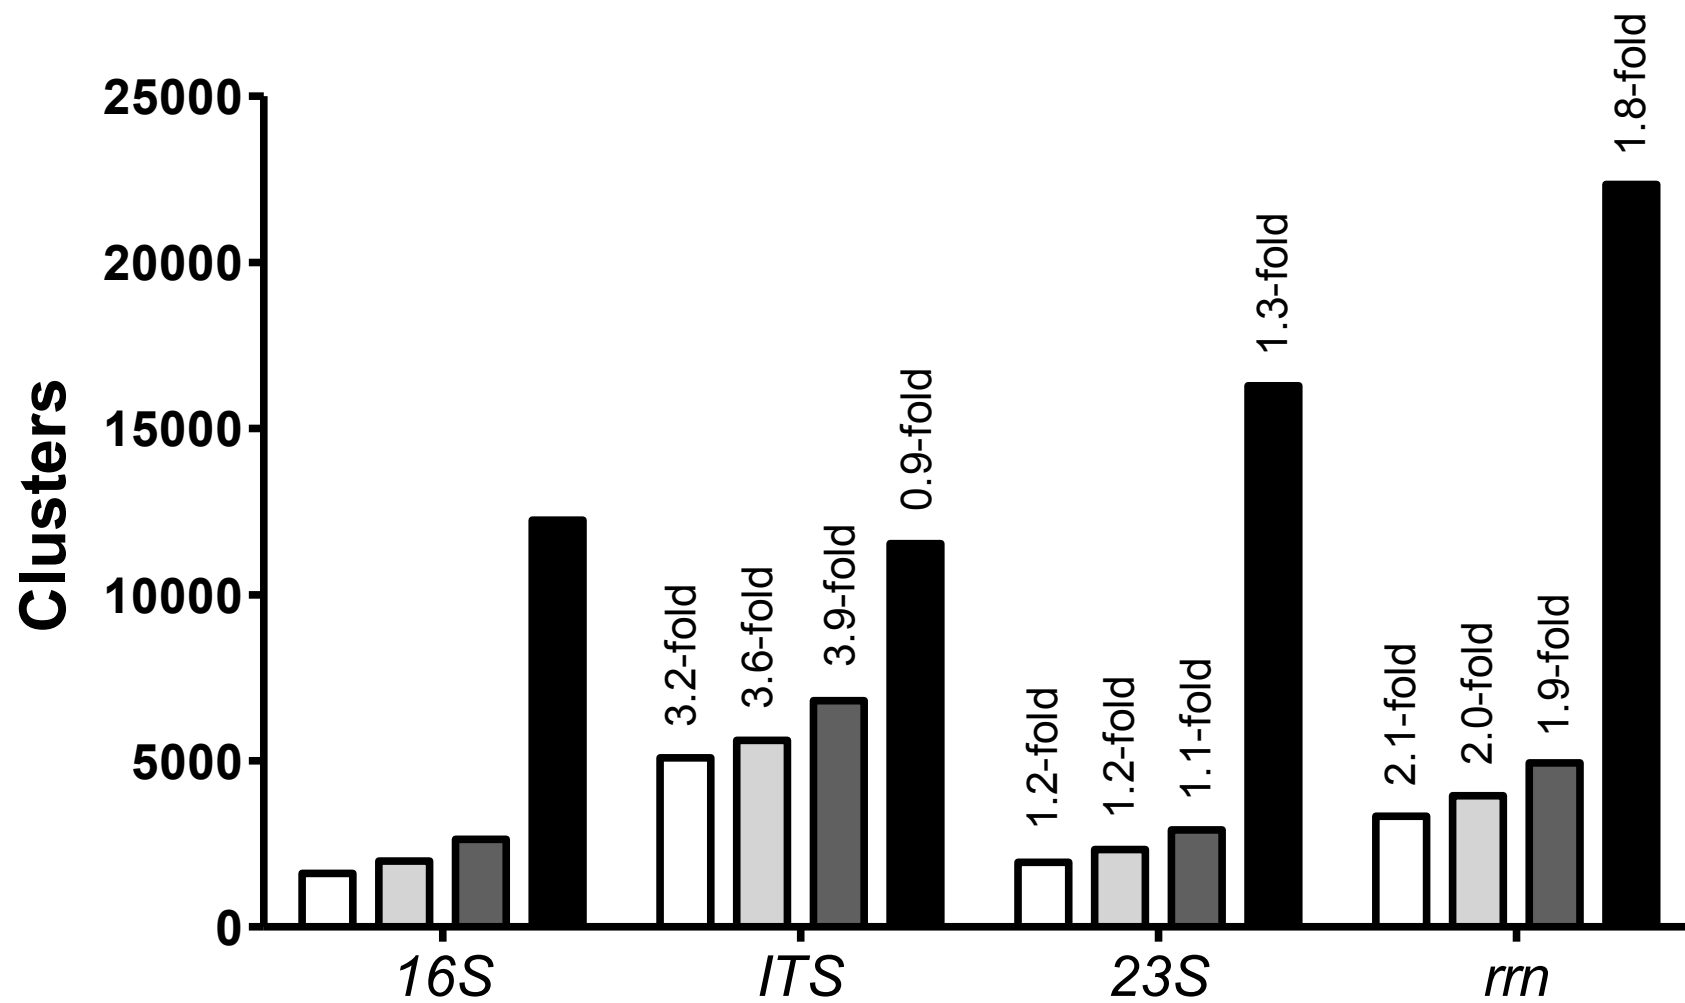

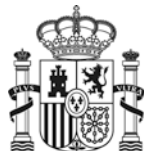

MINISTERIO  
DE ECONOMÍA  
Y COMPETITIVIDAD

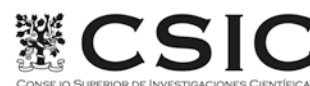

INSTITUTO DE AGROQUÍMICA Y  
TECNOLOGÍA DE ALIMENTOS (IATA)

Laurie Goodman Ph.D.  
Editor in Chief  
GigaScience Journal

Subject: Manuscript submission

Dear Dr Goodman,

Please find attached our manuscript entitled "**Multi-locus and ultra-long amplicon sequencing approach to study microbial diversity at species level using the MinION™ portable nanopore sequencer**" which we would like you to consider for publication in the *GigaScience Journal*. With the submission of this manuscript I would like to undertake that the above mentioned manuscript has not been published elsewhere, accepted for publication elsewhere or under editorial review for publication elsewhere; and that my Institute's (IATA-CSIC) representative is fully aware of this submission.

For the Editor(s) who will handle this document, I would like to disclose the following information about the manuscript:

In the post-genomic era, analysis of the great amount of genetic information derived from microbial communities have permitted to explore their diversity and genetic variability, characteristics that help to disclose certain bacterial groups associated with healthy status and pathogenicity then gaining insights in the microbe-host co-evolution. Nowadays, large scale analyses are needed with the aim of unraveling the complete repertoire of microbes present in different human- and environmental-associated niches. To date, the paired-end short reads approaches for massive sequencing permits the analysis of sequence information of roughly 30% (~500nt) of the 16S rDNA, leaving taxonomic assignment of reads at the species level elusive. Therefore, implementation of long-read sequencing approaches to study the 16S rRNA genes should be determinant to design new studies conducted to evidence the real and central role of precise bacterial species in a great variety of microbial consortia.

Although some efforts have been done in order to assess the almost-full bacteria 16S DNA sequence in order to improve the taxonomy identification in microbial communities, we have moved a step forward to set a new approach that include a multi-locus design to study a consensus bacterial chromosome region highly variable in terms of sequence and gene content. Consequently, in this study, we have explored again the scope of MinION™ into microbial diversity studies by using an ultra-long amplicon sequencing methodology to study simultaneously the 16S, ITS, and 23S regions of the DNA obtained from two different mock bacterial communities in multiplex manner. The usage of MinION™ platform allowed the acquisition of 1D reads of moderate quality which were enough to reconstruct efficiently the microbial community structure artificially compiled into the HM-782D and D6305 commercial DNAs.

To our knowledge, this is the first report to perform a microbial diversity study comparing such level of genetic information derived from a single PCR reaction and sequenced in multiplex manner in a third generation sequencing device. As a consequence, we anticipated a large impact to the scientific community working on this field as the information we provide and retrieved from the nanopore portable DNA sequencer will serve to better describe the diversity of human- or environmental-derived microbial communities.

Thanks for taking this into consideration.

Best wishes,

**Alfonso Benítez Páez Ph.D.**  
Corresponding Author  
Agrochemistry and Food Technology Institute (IATA-CSIC)  
abenitez@iata.csic.es
