# Supplementary material for: Multi-locus and long amplicon sequencing approach to study microbial diversity at species level using the MinION™ portable nanopore sequencer
Source: PubMed Central journal article supplement (PMC5534310; doi:10.1093/gigascience/gix043), 2017-06-12

## HM782D

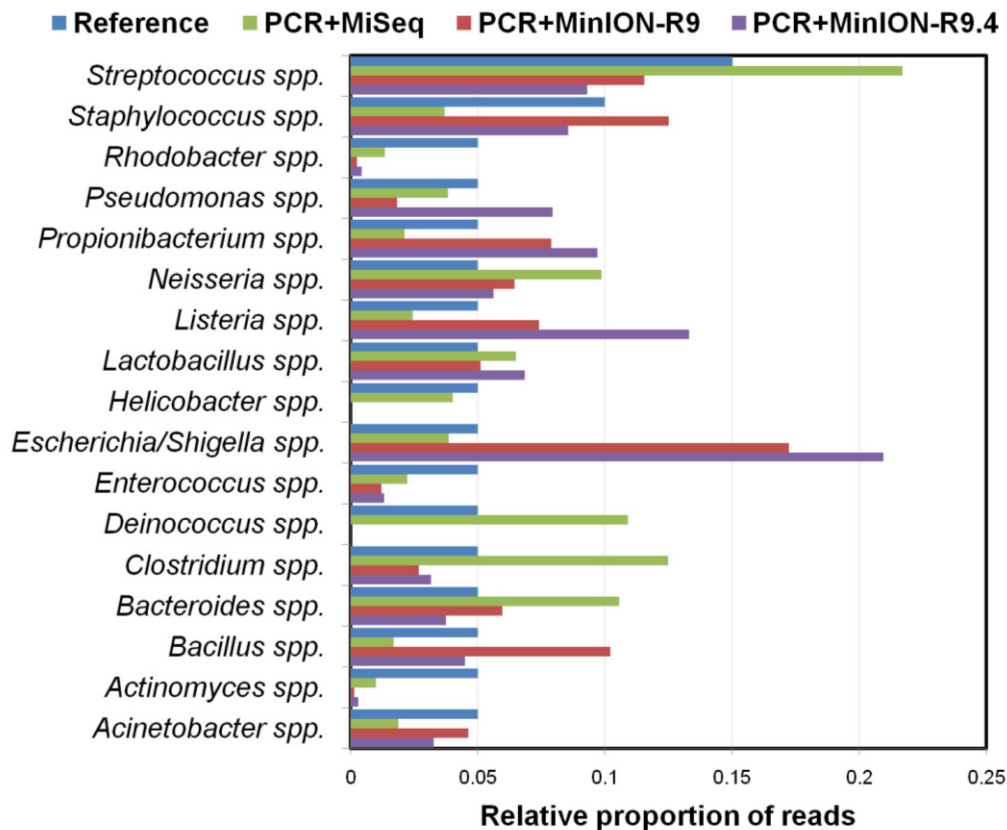

## D6305

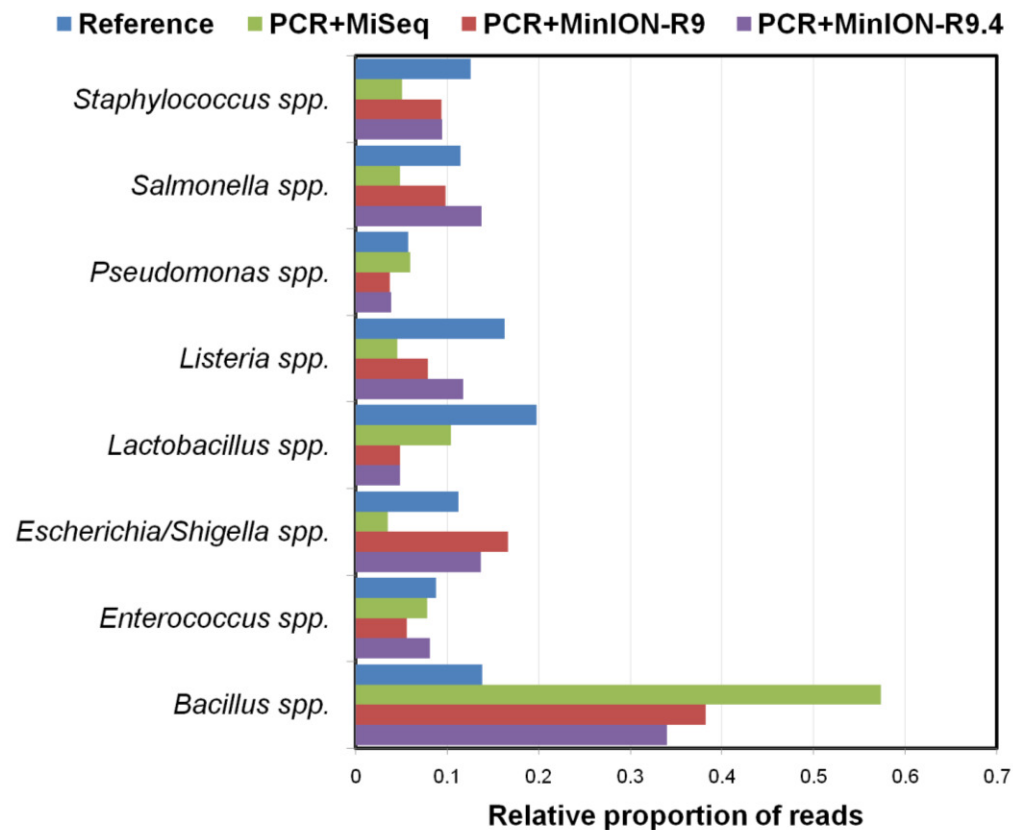

Supplement: gix043_Supplementary_Material_1.pdf [file gix043_Supplementary_Material_1.pdf]
